# Supplementary material for: Secondary analyses to test the impact on inequalities and uptake of the schools-based human papillomavirus (HPV) vaccination programme by stage of implementation of a new consent policy in the south-west of England
Source: HighWire-hosted journal article supplement (doi:10.1136/bmjopen-2020-044980), 2021-07-01
Supplement: bmjopen-2020-044980supp001_data_supplement.pdf [file bmjopen-2020-044980supp001_data_supplement.pdf]

*Supplementary material 1. Pathway of new consent procedures***Stage One****Parental written consent**

- Consent forms sent home via school to parents
- School collate forms for the vaccination session
- Young women with signed consent forms receive the HPV vaccine

**Stage Two****Parental verbal consent & adolescent self-consent**

- For young women without signed consent forms, parents telephoned for opportunity to verbally consent
- Young women asked whether discussion about vaccination had taken place at home
- Young women assessed for self-consent by immunisation team

**Stage Three****Community catch-up clinics & family practice**

- Unvaccinated young women are provided with written information about community catch-up clinics
- Some young women may also choose to be vaccinated in the family practice setting
